# Supplementary material for: Self-amplifying RNA SARS-CoV-2 lipid nanoparticle vaccine candidate induces high neutralizing antibody titers in mice
Source: Springer Nature journal article supplement (doi:10.1038/s41467-020-17409-9), 2020-07-09
Supplement: 41467_2020_17409_MOESM1_ESM.pdf [file 41467_2020_17409_MOESM1_ESM.pdf]

**Supplementary Information for:**  
**Self-amplifying RNA SARS-CoV-2 lipid nanoparticle vaccine candidate induces high  
neutralizing antibody titers in mice**

Paul F. McKay<sup>1</sup>, Kai Hu<sup>1</sup>, Anna K. Blakney<sup>1</sup>, Karnyart Samnuan<sup>1</sup>, Jonathan C. Brown<sup>1</sup>, Rebecca Penn<sup>1</sup>, Jie Zhou<sup>1</sup>, Clément R. Bouton<sup>1</sup>, Paul Rogers<sup>1</sup>, Krunal Polra<sup>1</sup>, Paulo J.C. Lin<sup>2</sup>, Christopher Barbosa<sup>2</sup>, Ying K. Tam<sup>2</sup>, Wendy S. Barclay<sup>1</sup>, Robin J. Shattock<sup>1,\*</sup>

<sup>1</sup> Department of Infectious Diseases, Imperial College London, Norfolk Place, London, United Kingdom W2 1PG

<sup>2</sup> Acuitas Therapeutics, Vancouver, British Columbia, Canada, V6T 1Z3

\*Corresponding author. Email: r.shattock@imperial.ac.uk

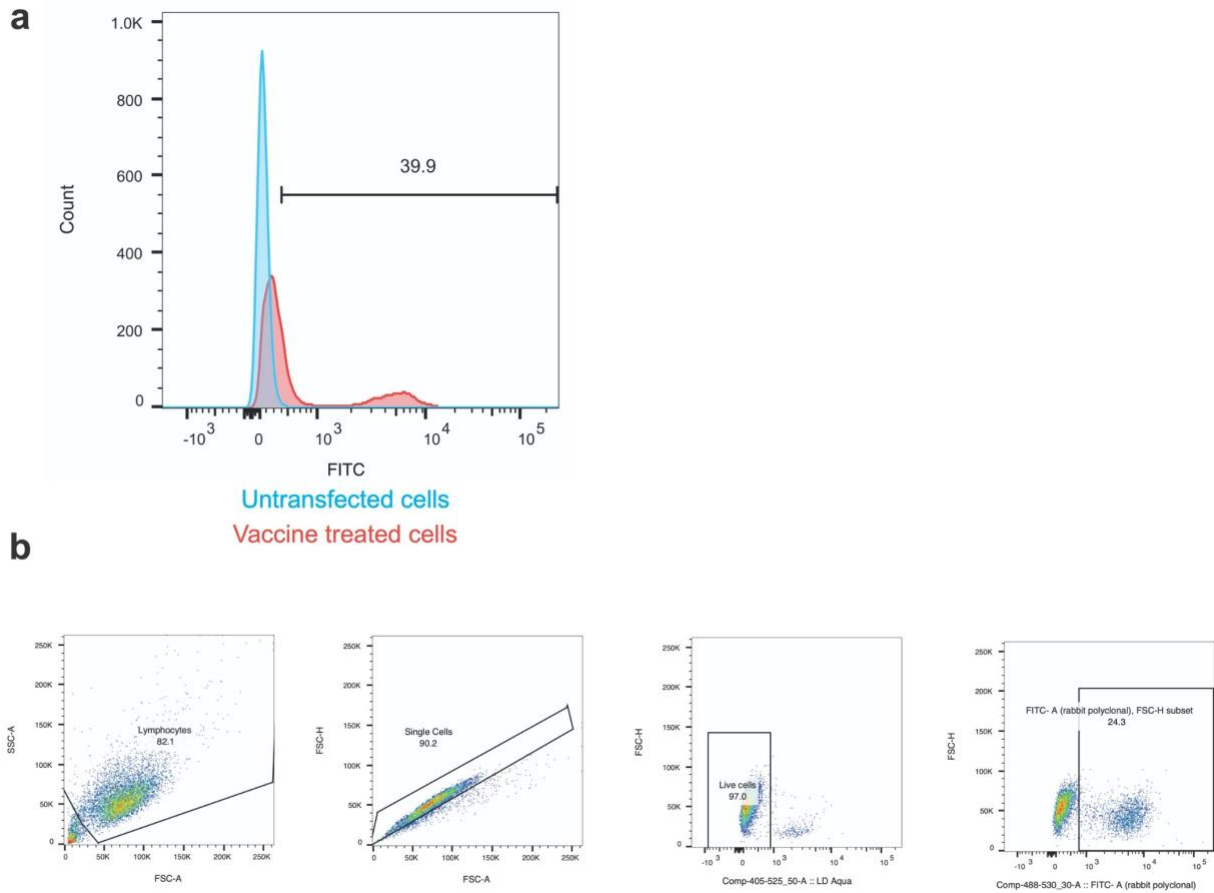

**Supplementary Figure 1.** Flow cytometry of HEK293T.17 cells transfected with saRNA expressing membrane bound SARS-CoV-2 spike protein. HEK293T.17 cells were transfected with 1  $\mu$ g of saRNA encoding a membrane bound SARS-CoV-2 spike protein complexed with Lipofectamine MessengerMAX™ and stained with a fixable aqua live/dead stain, as well as SARS-CoV spike protein polyclonal antibody as a FITC-labelled secondary antibody.

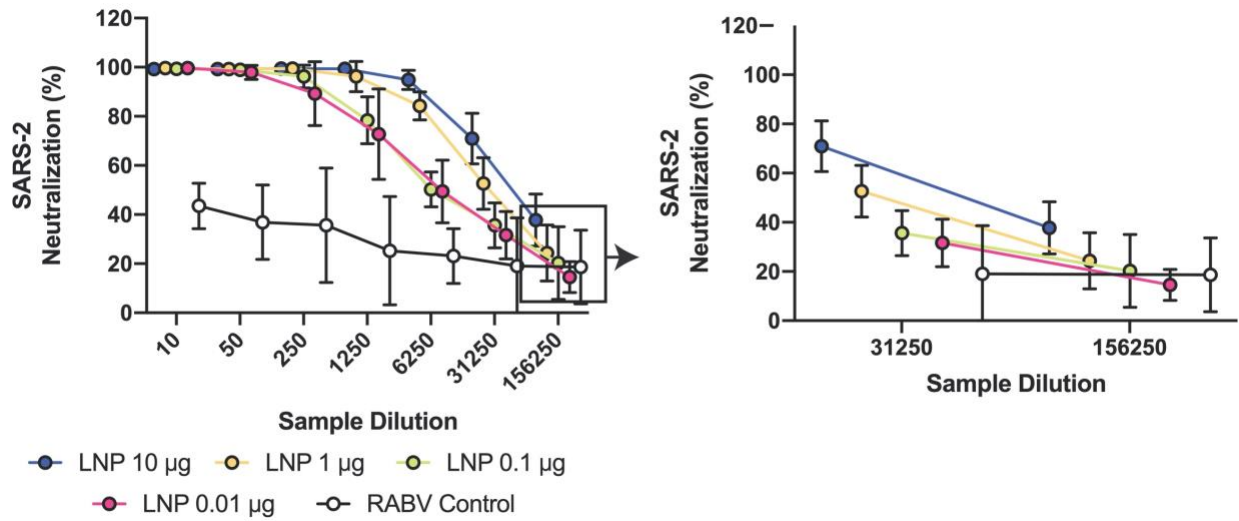

**Supplementary Figure 2.** Quantification of antibody-dependent enhancement (ADE) via wild type virus neutralization of sera from BALB/c mice vaccinated with doses of LNP-formulated saRNA ranging from 0.01-10 µg of saRNA with n=7 biologically independent animals. Line and error bars indicated mean ± SD.

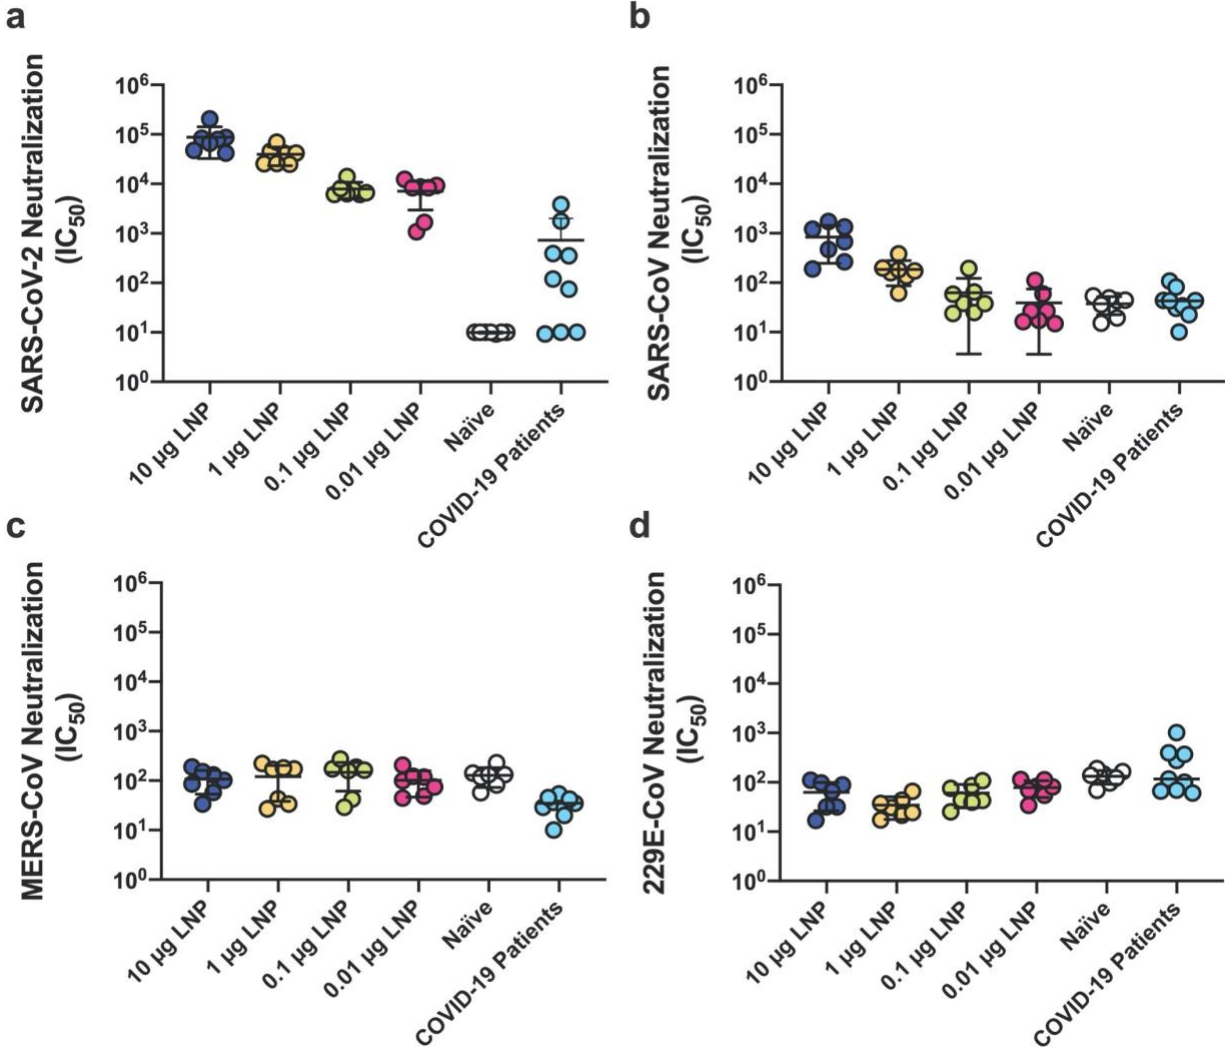

**Supplementary Figure 3.** Pseudotyped virus neutralization of sera from BALB/c mice vaccinated with LNP formulations (n=7 biologically independent animals) and human patients (n=9 biologically independent samples) after recovery from COVID-19. Line and error bars indicated mean  $\pm$  SD.

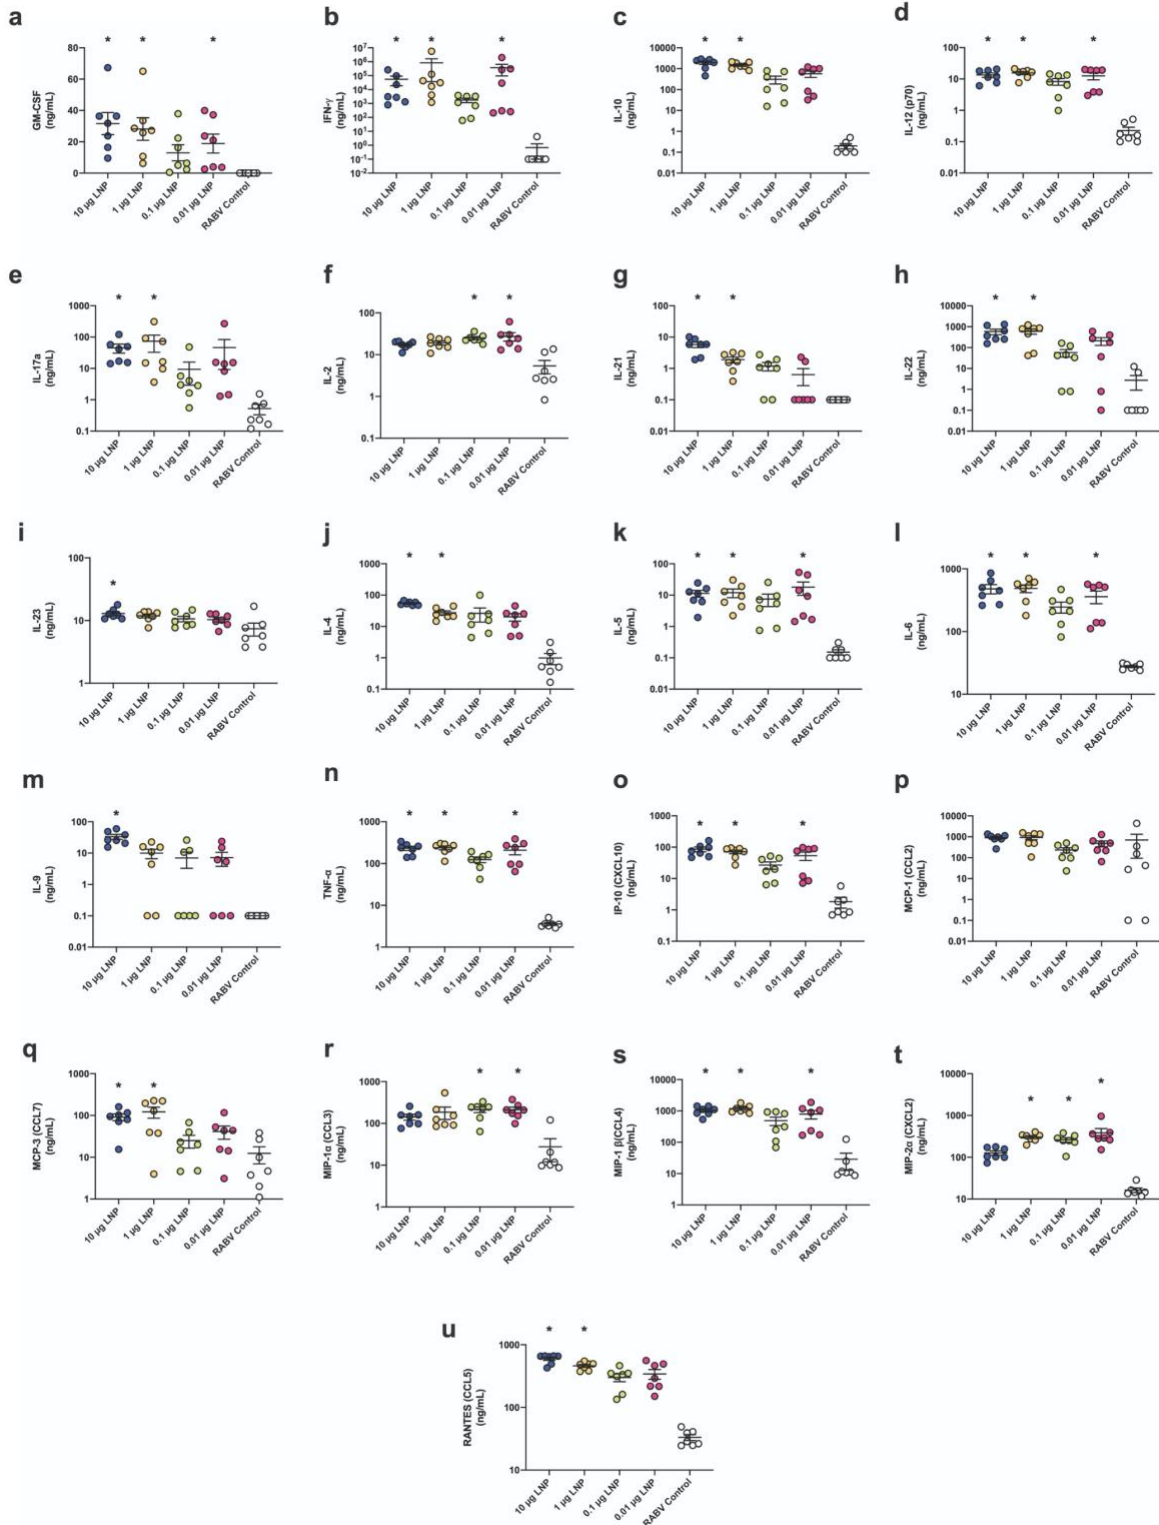

**Supplementary Figure 4.** Cytokine response of re-stimulated splenocytes of vaccinated mice (n=7 biologically independent animals) with recombinant SARS-CoV-2 protein. \* indicates significance of  $p < 0.05$  as determined by a Kruskal-Wallis test. Line and error bars indicated mean  $\pm$  SD.

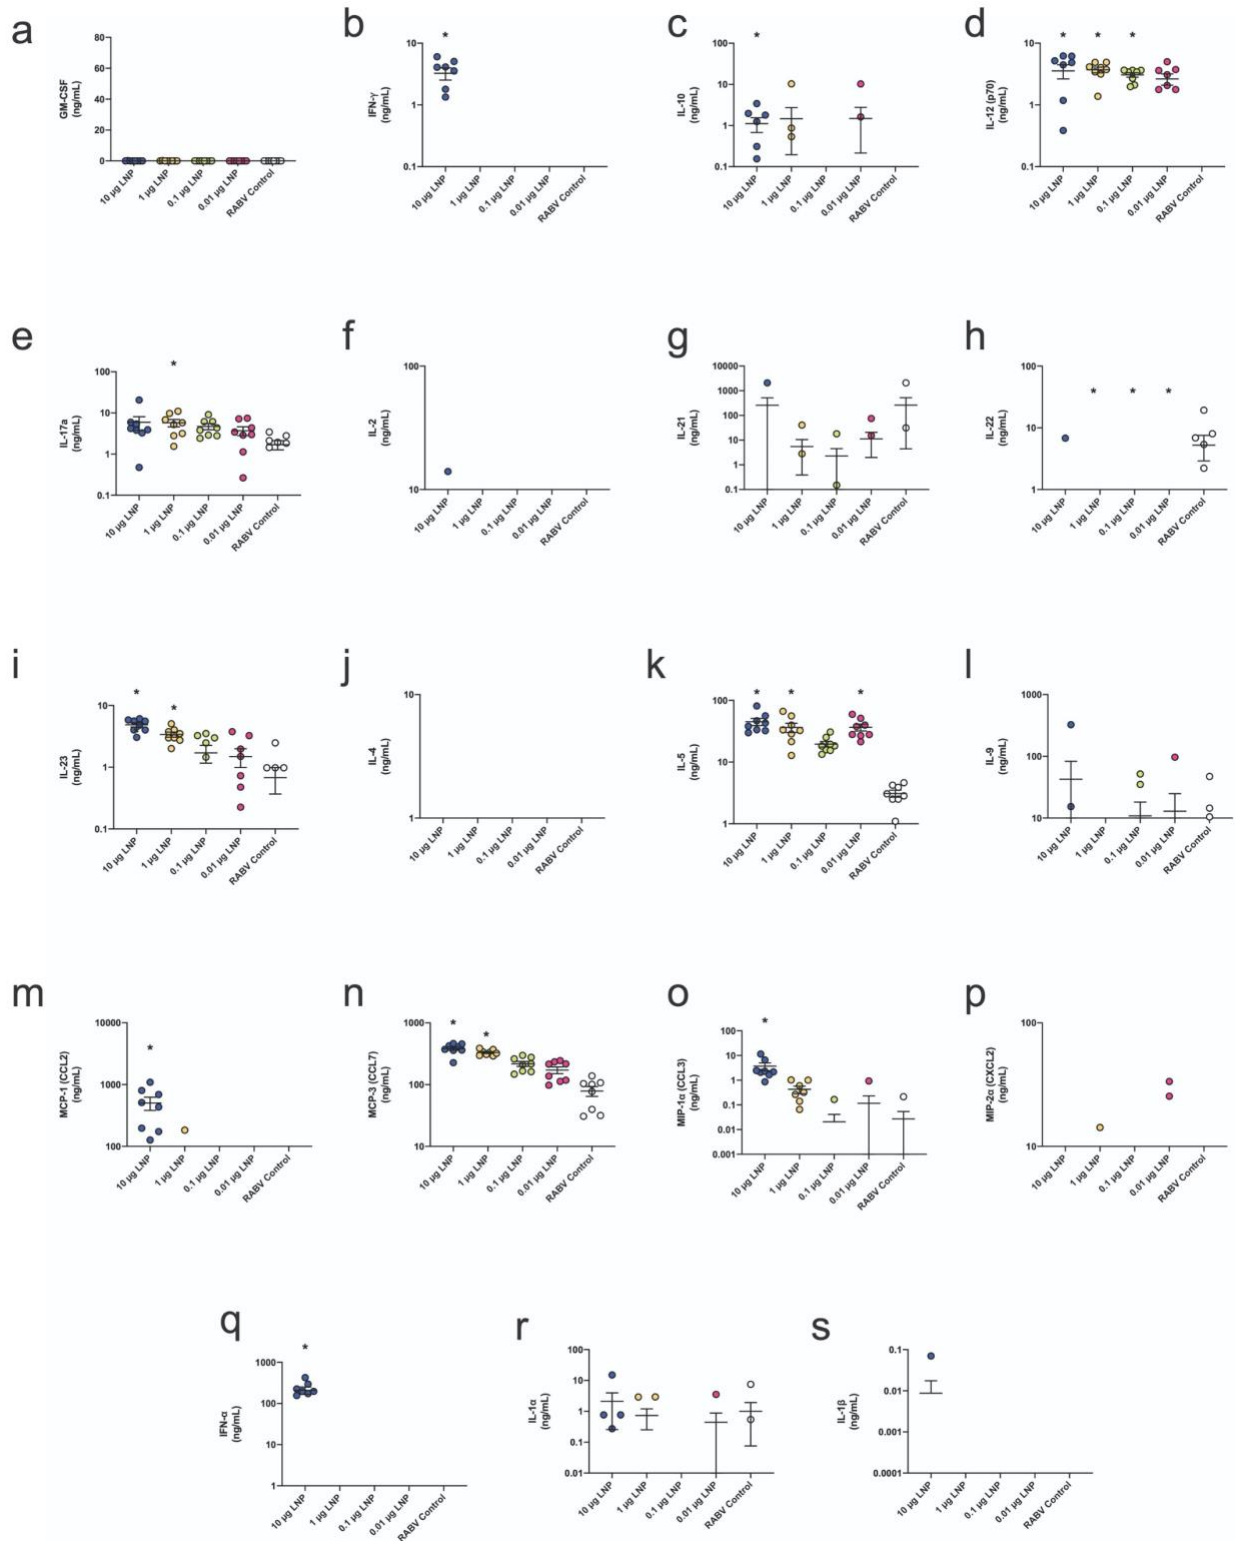

**Supplementary Figure 5.** Cytokine response in the sera of mice (n=7 biologically independent animals) 4 hours after vaccination with SARS-CoV-2 LNP vaccine. \* indicates significance of  $p < 0.05$  as determined by a Kruskal-Wallis test. Line and error bars indicated mean  $\pm$  SD.

AUGGGCGGCGCAUGAGAGAAGCCCAGACCAAUUACCUACCCAAAAUGGAGAAAGUUCAC  
GUUGACAUCGAGGAAGACAGCCCAUUCUCAGAGCUUUGCAGCGGAGCUUCCCGCAGU  
UUGAGGUAGAAGCCAAGCAGGUCACUGAUAAUGACCAUGCUAAUGCCAGAGCGUUUUC  
GCAUCUGGCUUCAAACUGAUCGAAACGGAGGUGGACCCAUCCGACACGAUCCUUGACA  
UUGGAAGUGCGCCCGCCCGCAGAAUGUAUUCUAAGCACAAAGUAUCAUUGUAUCUGUCC  
GAUGAGAUGUGCGGAAGAUCGCGACAGAUUGUAUAAGUAUGCAACUAAGCUGAAGAAAA  
ACUGUAAGGAAUAACUGAUAAAGGAAUUGGACAAGAAAAUGAAGGAGCUGGCCGCCGUC  
AUGAGCGACCCUGACCUGGAAACUGAGACUAUGUGCCUCCACGACGACGAGUCGUGUC  
GCUACGAAGGGCAAGUCGCUUUUACCAGGAUGUAUACGCGGUUGACGGACCGACAAG  
UCUCUAUCACCAAGCCAAUAAGGGAGUUAGAGUCGCCUACUGGAUAGGCUUUGACACCA  
CCCCUUUUAUGUUUAAGAACUUGGCUGGAGCAUAUCCAUCAUACUCUACCAACUGGGCC  
GACGAAACCGUGUUAACGGCUCGUAACAUAAGGCCUAUGCAGCUCUGACGUUAUGGAGC  
GGUCACGUAGAGGGGAUGUCCAUCUUAAGAAAGUAUUUGAAACCAUCCAACAUGUU  
CUAUUCUCUGUUGGCUCGACCAUCUACCACGAGAAGAGGGACUUAACUGAGGAGCUGGC  
ACCUGCCGUCUGUAUUUCACUUAACGUGGCAAGCAAAAUAACACAUGUCGGUGUGAGACU  
AUAGUUAGUUGCGACGGUACGUCGUUAAAAGAAUAGCUAUCAGUCCAGGCCUGUAUG  
GGAAGCCUUCAGGCUAUGCUGCUACGAUGCACCGCGAGGGAUUCUUGUGCUGCAAAGU  
GACAGACACAUUGAACGGGGAGAGGGUCUCUUUCCCGUGUGCACGUAUGUGCCAGCU  
ACAUUGUGUGACCAAUGACUGGCAUACUGGCAACAGAUGUCAGUGCGGACGACGCGC  
AAAACUIGCUGGUUGGGCUCACACAGCGUAUAGUCGUAACGGUCGCACCCAGAGAAAC  
ACCAUACCAUGAAAAUUACCUUUUGCCCGUAGUGGCCCCAGGCAUUUGCUAGGUGGG  
CAAAGGAAUAUAAGGAAGAUCAAGAAGAUAAAGGCCACUAGGACUACGAGAUAGACAG  
UUAGUCAUGGGGUGUUGUUGGGCUUUUJAGAAGGCACAAGAUAAUCAUUAUUUAAGC  
GCCCGGAUACCCAAACCAUCAUCAAAAGUGAACAGCGAUUUCACUCAUUCGUGCUGCCC  
AGGAUAGGCAGUAACACAUAUUGGAGAUUCGGCUGAGAACAAGAAUCAGGAAAAUGUUAGA  
GGAGCACAAGGAGCCGUCACCUCUCAUUAACCGCCGAGGACGUACAAGAAGCUAAGUGC  
GCAGCCGAUGAGGCUAAGGAGGUGCGUGAAGCCGAGGAGUUGCGCGCAGCUCUACCAC  
CUUUGGCAGCUGAUGUUGAGGAGCCCACUCUGGAAGCCGAUGUCGACUUGAUGUUACA  
AGAGGCUGGGGCGGCUCAGUGGAGACACCUCGUGGGCUUGAUAAAGGUUACCAGCUAC  
GAUGGCGAGGACAAGAUCGGCUCUUAACGUCUGUCUUUCUCCGCAGGCUGUACUCAAGA  
GUGAAAAAUUAUCUUGCAUCCACCCUCUCGCUGAACAAGUCAUAGUGAUAAACACACUCU  
GGCCGAAAAGGGCGUUAUGCCGUGGAACCAUACCAUGGUAAAGUAGUGGGUGCCAGAGG  
GACAUGCAAUACCCGUCAGGACUUUCAAGCUCUGAGUGAAAGUGCCACCAUUGUGUAC  
AACGAACGUGAGUUCGUAAACAGGUACCUGCACCAUAUUGCCACACAUGGAGGAGCGCU  
GAACACUGAUGAAGAAUAUUAACAAACUGUCAAGCCCAGCGAGCACGACGGCGAAUACC  
UGUACGACAUCGACAGGAAACAGUGCGUCAAGAAAGAACUAGUCACUGGGCUAGGGCUC  
ACAGGCGAGCUGGUGGAUCCUCCCUUCCAUGAAUUCGCCUACGAGAGUCUGAGAACAC  
GACCAGCCGCUCUACCAAGUACCAACCAUAGGGGUGUAUGGCGUGCCAGGAUCAGG  
CAAGUCUGGCAUCAUUAAGGCGCAGUCACCAAAAAAGAUUAUGUGGUGAGCGCCAAGA  
AAGAAAACUGUGCAGAAAUUAUAAGGGACGUAAGAAAAUGAAAGGGCUGGACGUCAAU  
GCCAGAACUGUGGACUCAGUGCUCUUGAAUGGAUGCAAACACCCCGUAGAGACCCUGU  
AUUUUGACGAAGCUUUUGCUUGUCAUGCAGGUACUCUCAGAGCGCUCUAUGCCAUUAUA  
AGACCUAAAAAGGCAGUGCUCUGCGGGGAUCCCAACAGUGCGGUUUUUUAACAUGAU  
GUGCCUGAAAGUGCAUUUUAAACCACGAGAUUUGCACACAAGUCUCCACAAAAGCAUCU  
CUCGCCGUUGCACUAAAUCUGUGACUUCGGUCGUCUCAACCUUGUUUUACGACAAAAA  
AUGAGAACGACGAUCCGAAAGAGACUAAGAUUGUGAUUGACACUACCGGCAGUACCAA  
ACCUAAGCAGGACGAUCUCAUUCACUUGUUUCAGAGGGUGGGUGAAGCAGUUGCAA  
AUAGAUUACAAGGCAACGAAUAUUGACGGCAGCUGCCUCUCAAGGGCUGACCCGUAA  
AGGUGUGUAUGCCGUUCGGUACAAGGUGAAUGAAAAUCCUCUGUACGCACCCACCUC  
GAACAUGUGAACGUCCUACUGACCCGCACGGAGGACCGCAUCGUGUGGAAAACACUAG  
CCGGCGACCCAUGGAUAAAACACUGACUGCCAAGUACCCUGGGAAUUUCACUGCCACG

AUAGAGGAGUGGCAAGCAGAGCAUGAUGCCAUCAUGAGGCACAUCUUGGAGAGACCGG  
ACCCUACCGACGUCUUCAGAAUAAGGCAAACGUGUGUUGGGCCAAGGCUUUAGUGCC  
GGUGCUGAAGACCGCUGGCAUAGACAUGACCACUGAACAAUGGAACACUGUGGAUUAUU  
UUGAAACGGACAAAGCUCACUCAGCAGAGAUAGUAUUGAACCAACUAUGCGUGAGGUUC  
UUUGGACUCGAUCUGGACUCCGGUCUAUUUUCUGCACCCACUGUUCGGUUAUCCAUA  
GGAUUAUCACUGGGAUAACUCCCCGUCGCCUAACAUGUACGGGCUGAAUAAAGAAGUG  
GUCCGUCAGCUCUCUCGCAGGUACCCACAACUGCCUCGGGCAGUUGCCACUGGAAGAG  
UCUAUGACAUGAACACUGGUACACUGCGCAAUUUAUGAUCCGCGCAUAAACCUAGUACCU  
GUAACAGAAAGACUGCCUCAUGCUUUAGUCCUCCACCAUAAUGAACACCCACAGAGUGA  
CUUUUCUUAUUCGUCAGCAAUUGAAGGGCAGAACUGUCCUGGUGGUCGGGGAAAAG  
UUGUCCGUCGCCAGGCAAAAUGGUUGACUGGUUGUCAGACCGGCCUGAGGCUACCUUA  
GAGCUCGGCUGGAUUUAGGCAUCCCAGGUGAUGUGCCCAAUAUGACAUAUUUUUGU  
UAAUGUGAGGACCCAUUAAAUAACCAUCACUAUCAGCAGUGUGAAGACCAUGCCAUA  
AGCUUAGCAUGUUGACCAAGAAAGCUUGUCUGCAUCUGAAUCCCGGCGGAACCUUGU  
CAGCAUAGGUUAUGGUUACGCUGACAGGGCCAGCGAAAGCAUCAUUGGUGCUAUAGCG  
CGGCAGUUCAAGUUUUCCGGGUAUGCAAACCGAAAUCCUCACUUGAAGAGACGGAAGU  
UCUGUUUGUAUUCAUUGGGUACGAUCGCAAGGCCCGUACGCACAAUUCUUACAAGCUU  
UCAUCAACCUUGACCAACAUUUUAACAGGUUCCAGACUCCACGAAGCCGGAUGUGCACC  
CUCAUAUCAUGUGGUGCGAGGGGAUUAUUGCCACGGCCACCGAAGGAGUGAUUUAUU  
GCUGCUAACAGCAAAGGACAACCUGGCGGAGGGGUGUGCGGAGCGCUGUAUAAGAAU  
UCCCGGAAAGCUUCGAUUUACAGCCGAUCGAAGUAGGAAAAGCGCGACUGGUCAAAGG  
UGCAGCUAAACAUUAUCAUUGCCGUAGGACCAACUUAACAAGUUUCGGAGGUUG  
AAGGUGACAACAGUUGGCAGAGGCUUAUGAGUCCAUCGCUAAGAUUGUCAACGAUAAC  
AAUUAACAAGUCAGUAGCGAUUCCACUGUUGUCCACCGGCAUCUUUUCGGGAACAAAGA  
UCGACUAACCCAAUCAUUGAACCAUUUGCUGACAGCUUUAGACACCACUGAUGCAGAUG  
UAGCCAUAUACUGCAGGGACAAGAAUUGGGAAUAGACUCUCAAGGAAGCAGUGGCUAGG  
AGAGAAGCAGUGGAGGAGAUUUGCAUAUCCGACGACUCUUCAGUGACAGAACCUGAUGC  
AGAGCUGGUGAGGGUGCAUCCGAAGAGUUCUUUGGCUGGAAGGAAGGGCUACAGCACA  
AGCGAUGGCAAAACUUUCUCAUAUUUGGAAGGGACCAAGUUUCACCAGGCGGCCAAGGA  
UAUAGCAGAAUUAUUGCCAUGUGGCCCGUUGCAACGGAGGCCAAUAGCAGGUUAGC  
AUGUAUAUCCUCGGAGAAAGCAUGAGCAGUAUUAGGUCGAAUUGCCCCGUCGAAGAGUC  
GGAAGCCUCCACACCACCUAGCACGCUUGCCUUGCUUGUGCAUCCAUGCCAUGACUCCA  
GAAAGAGUACAGCGCCUAAAAGCCUCACGUCCAGAACAAUUAUCUGUGUCUCAUCCUU  
UCCAUUGCCGAAGUAUAGAUAUCACUGGUGUGCAGAAGAUCCAAUUGCUCUCCAGCCUAU  
UGUUCUCACCGAAAGUGCCUGCGUAUAUUAUCAUCCAAGGAAGUAUCUCGUGGAAACACCA  
CCGGUAGACGAGACUCCGGAGCCAUCGGCAGAGAACCAUCCACAGAGGGGACACCUG  
ACAACCACCACUUAUAACCGAGGAUGAGACCAGGACUAGAACGCCUGAGCCGAUCAUC  
AUCGAAGAGGAAGAAGAGGAUAGCAUAAGUUUGCUGUCAGAUGGCCCGACCCACCAGG  
UGCUGCAAGUCGAGGCAGACAUUCACGGGCCGCCUCUGUAUCUAGCUCUCCUGGUC  
CAUUCUCAUGCAUCCGACUUUGAUGUGGACAGUUUAUCCAUAUCUAGACACCUGGAG  
GGAGCUAGCGUGACCAGCGGGGCAACGUCAGCCGAGACUACUCUUACUUCGCAAAGA  
GUAUGGAGUUUCUGGGCGGACCGGUGCCUGCGCCUCGAACAGUAUUCAGGAACCCUCC  
ACAUCCCGCUCGCGCACAAGAACACCGUCACUUGCACCCAGCAGGGCCUGCUCGAGAA  
CCAGCCUAGUUUCCACCCCGCCAGGCGUGAAUAGGGUGAUCACUAGAGAGGAGCUCGA  
GGCGCUUACCCCGUCACGCACUCCUAGCAGGUCGGUCUCGAGAACCAGCCUGGUCUCC  
AACCCGCCAGGCGUAAAUAGGGUGAUUACAAGAGAGGAGUUUGAGGCGUUCGUAGCAC  
ACAACAUAUGACGGUUUGAUGCGGGUGCAUACAUCUUUUCUCCGACACCGGUCAAGG  
GCAUUUACAACAAAAUCAGUAAGGCAAACGGUGCUAUCCGAAGUGGUGUUGGAGAGGA  
CCGAAUUGGAGAUUUCGUUUGCCCCGCGCCUCGACCAAGAAAAAGAAGAAUUAUCACGC  
AAGAAAUAACAGUUAUUUCCACACCUUGCUAACAGAAAGCAGAUACCAGUCCAGGAAGGU  
GGAGAACAUGAAAGCCAUAACAGCUAGACGUUUCUGCAAGGCCUAGGGCAUUAUUUGA



AGGCAGAAGGAAAAGUGGAGUGCUACCGAACCCUGCAUCCUGUUCCUUGUAUUCAUC  
UAGUGUGAACCGUGCCUUUUAAGCCCCAAGGUCGCAGUGGAAGCCUGUAACGCCAUG  
UUGAAAGAGAACUUUCCGACUGUGGCCUUCUACUGUAUUUCCAGAGUACGAUGCCUA  
UUUGGACAUGGUUGACGGAGCUUCAUGCUGCUUAGACACUGCCAGUUUUUGCCCUGCA  
AAGCUGCGCAGCUUUCCAAAGAAACACUCCUAUUUGGAACCCACAUAACGAUCGGCAGU  
GCCUUCAGCGAUCCAGAACACGCUCCAGAACGUCCUGGCAGCUGCCACAAAAGAAAUU  
GCAAUGUCACGCAAAUGAGAGAAUUGCCCGUAUUGGAUUCGGCGGCCUUUAAUGUGGA  
AUGCUUCAAGAAAUAUGCGUGUAAUAAUGAAUAUUGGGAAACGUUUAAAGAAAACCCCA  
UCAGGCCUACUGAAGAAAACGUGGUAAAUAACAUUACCAAUUAAGGACCAAAGCUG  
CUGCUCUUUUUGCGAAGACACAUAAUUUGAAUAUGUUGCAGGACAUAACAAUGGACAGG  
UUUGUAUUGGACUUAAGAGAGACGUGAAAGUGACUCCAGGAACAAAACAUACUGAAGA  
ACGGCCCAAGGUACAGGUGAUCCAGGCUGCCGAUCCGCUAGCAACAGCGUAUCUGUGC  
GGAUCCACCGAGAGCUGGUUAGGAGAUUAAAUGCGGUCCUGCUUCCGAACAUUCAUA  
CACUGUUUGAUUUGUCGGCUGAAGACUUUGACGCUAUUUAUAGCCGAGCACUCCAGCC  
UGGGGAUUGUGUUCUGGAAACUGACAUCGCGUCGUUUGAUAAAAGUGAGGACGACGCC  
AUGGCUCUGACCCGCUUAAUGAUUCUGGAAGACUUAAGGUGUGGACGCAGAGCUGUUGA  
CGCUGAUUUGAGGCGGCCUUUCGGCGAAAUUUCAUCAAUACAUUUGCCCACUAAAACUAAA  
UUUAAAUUUCGGAGCCAUGAUGAAAUCUGGAAUGUUCUCACACUGUUUGUGAACACAGU  
CAUUAACAUUGUAUUCGCAAGCAGAGUGUUGAGAGAACGGCUAACCCGGAUCACCAUGUG  
CAGCAUUCAUUGGAGAUGACAUAUCGUGAAAGGAGUCAAAUCGGACA AAUUAUUGGCA  
GACAGGUGCGCCACCUGGUUGAAUAUGGAAGUCAAGAUUAUAGAUGCUGUGGGUGGGCG  
AGAAAGCGCCUUAAUUUCUGUGGAGGGUUUUAUUUUGUGUGACUCCGUGACCCGGCACAGC  
GUGCCGUGUGGCAGACCCCCUAAAAAGGCUGUUUAAGCUUGGCAAACCUCUGGCAGCA  
GACGAUGAACAUGAUGAUGACAGGAGAAGGGCAUUGCAUGAAGAGUCAACACGCUGGAA  
CCGAGUGGGUAUUCUUUCAGAGCUGUGCAAGGCAGUAGAUAAGGUUAUGAAACCGUA  
GGAACUCCAUCAUAGUUAUGGCCAUGACUACUCUAGCUAGCAGUGUAAAUCAUUCAG  
CUACCUGAGAGGGGCCCCUUAACUCUCUACGGCUAACCCUGAAUGGACUACGACAUAGU  
CUAGUCCGCCAAGUCUAGCAUUGGCCACCAUGUUCGUGUUUCUGGUGCUGCUGCCUC  
UGGUGUCCAGCCAGUGUGUGAACCUGACCACCAGAACACAGCUGCCUCCAGCCUACAC  
CAACAGCUUUACCAGAGGCGUGUACUACCCCGACAAGGUGUUCAGAUCACGCGUGCUG  
CACUCUACCCAGGACCUGUUCUGCCUUUCUUCAGCAACGUGACCUGGUUCCACGCCA  
UCCACGUGUCCGGCACCAUUGGCACCAAGAGAUUCGACAACCCCGUGCUGCCCUUCAAC  
GACGGGGUGUACUUUGCCAGCACCGAGAAGUCCAACAUCAUCAGAGGCUGGAUCUUCG  
GCACCACACUGGACAGCAAGACCCAGAGCCUGCUGAUUCGUGAACAACGCCACCAACGUG  
GUCAUCAAAAGUGUGCGAGUUCAGUUCUGCAACGACCCCUUCCUGGGCGUCUACUACC  
ACAAGAACAACAAGAGCUGGAUGGAAAGCGAGUUCGGGUGUACAGCAGCGCCAACAAC  
UGCACCUUCGAGUACGUGUCCAGCCUUUCUGAUGGACCUGGAAGGCAAGCAGGGCA  
ACUUCAAGAACCUGCGCGAGUUCGUGUUAAGAACAUCGACGGCUACUUCAAGAUCUAC  
AGCAAGCACACCCCUAUAACCCUCGUGCGGGAUUCGCCUCAGGGCUUCUCUGCUCUGG  
AACCCUUGGUGGAUCUGCCCAUCGGCAUCAACAUCACCCGGUUUCAGACACUGCUGGC  
CCUGCACAGAAGCUACCUGACACCUGGCGAUAGCAGCAGCGGAUGGACAGCUGGUGCC  
GCCGCUUACUAUGUGGGCUACCUGCAGCCUAGAACCUUCCUGCUGAAGUACAACGAGA  
ACGGCACCAUCACCGACGCCGUGGAUUGUGCCCUUGAUCCUCUGAGCGAGACAAAGUG  
CACCCUGAAGUCCUUCACCGUGGAAAAGGGCAUCUACCAGACCAGCAACUUCGGGGUG  
CAGCCCACCGAAUCCAUCGUGCGGUUCCCCAAUAUCACCAAUCUGUGCCCCUUCGGCG  
AGGUGUUCAAUGCCACCAGAUUCGCCUCUGUGUACGCCUGGAACCGGAAGCGGAUCAG  
CAAUUGCGUGGGCCGACUACUCCGUGCUGUACAACUCCGCCAGCUUCAGCACCUUCAAG  
UGCUACGGCGUGUCCCUACCAAGCUGAACGACCUGUGCUUCACAAACGUGUACGCCG  
ACAGCUUCGUGAUCCGGGGAGAUGAAGUGCGGCAGAUUGCCCCUGGACAGACAGGCAA  
GAUCGCCGACUACAACUACAAGCUGCCCGACGACUUCACCGGCUGUGUGAUUGCCUGG  
AACAGCAACAACCUGGACUCCAAAGUCGGCGGCAACUACA AUUACCUGUACCGGCUGUU

CCGGAAGUCCAAUCUGAAGCCCUUCGAGCGGGACAUCUCCACCGAGAUCUAUCAGGCC  
GGCAGCACCCCUUGUAACGGCGUGGAAGGCUUCAACUGCUACUCCCACUGCAGUCCU  
ACGGCUUUCAGCCCACAAAUGGCGUGGGCUAUCAGCCCUACAGAGUGGUGGUGCUGAG  
CUUCGAACUGCUGCAUGCCCCUGCCACAGUGUGCGGCCCUAAGAAAAGCACCAAUCUC  
GUGAAGAACAAAUGCGUGAACUUAACUUAACGGCCUGACCGGCACAGGCGUGCUGA  
CAGAGAGCAACAAGAAGUUCUGCCAUUCAGCAGUUGGCGGGGAUUAUCGCCGAUAC  
CACAGACGCCGUUAGAGAUCCCCAGACACUGGAAAUCCUGGACAUCACCCCUUGCAGCU  
UCGGCGGAGUGUCUGUGAUCACCCUUGGCACCAACACCAGCAAUCAGGUGGCAGUGCU  
GUACCAGGACGUGAACUGUACCGAAGUGCCCGUGGCCAUUCACGCCGAUCAGCUGACA  
CCUACAUGGCGGGUGUACUCCACCGGCAGCAAUGUGUUUCAGACCAGAGCCGGCUGUC  
UGAUCGGAGCCGAGCACGUGAACAAUAGCUACGAGUGCGACAUCCCCAUCGGCGCUGG  
CAUCUGUGCCAGCUACCAGACACAGACAAACAGCCCCAGACGGGCCAGAUCUGUGGCCA  
GCCAGAGCAUCAUUGCCUACACAAUGUCUCUGGGCGCCGAGAACAGCGUGGCCUACUC  
CAACAACUCUAUCGCUAUCCCCACCAACUUCACCAUCAGCGUGACCACAGAGAUCUCCG  
CUGUGUCCAUGACCAAGACCAGCGUGGACUGCACCAUGUACAUCUGCGGGCGAUUCCAC  
CGAGUGCUCCAACCUUGCUGCUGCAGUACGGCAGCUUCUGCACCCAGCUGAAUAGAGCC  
CUGACAGGGAUUCGCCGUGGAACAGGACAAGAACACCCAAGAGGUGUUCGCCAAGUGA  
AGCAGAUUCACAAGACCCCUCCUAUCAAGGACUUCGGCGGCUUCAUUUCAGCCAGAUU  
CUGCCCGAUCCUAGCAAGCCAGCAAGCGGAGCUUCAUCGAGGACCUGCUGUUAACA  
AAGUGACACUGGCCGACGCCGGCUUCAUCAAGCAGUAUGGCGAUUGUCUGGGCGACAU  
UGCCGCCAGGGAUUCGAUUUGCGCCCAGAAGUUUAACGGACUGACAGUGCUGCCUCCU  
CUGCUGACCGAUGAGAUGAUCGCCCAGUACACAUCUGCCCUGCUGGCCGGCACAUA  
CAAGCGGCUGGACAUUUGGAGCUGGCCGCCGCUUCUGCAGAUCCCUUUGCUAUGCAGAU  
GGCCUACAGAUUCAACGGCAUCGGAGUGACCCAGAAUGUGCUGUACGAGAACCAGAAG  
CUGAUCGCCAACCCAGUUAACAGCGCCAUCGGCAAGAUCAGGACAGCCUGAGCAGCAC  
AGCAAGCGCCCUGGGAAAGCUGCAGGACGUGGUCAACCAGAAUGCCCAGGCACUGAAC  
ACCCUGGUCAAGCAGCUGUCCUCCAACUUCGGCGCCAUCAGCUCUGUGCUGAACGAUA  
UCCUGAGCAGACUGGACCCUCCUGAGGCCGAGGUGCAGAUCCGACAGACUGAUCACAGG  
CAGACUGCAGAGCCUCCAGACAUACGUGACCCAGCAGCUGAUCAGAGCCGCCGAGAUUA  
GAGCCUCUGCCAAUCUGGCCGCCACCAAGAUGUCUGAGUGUGUGCUGGGCCAGAGCAA  
GAGAGUGGACUUUUGCGGCAAGGGCUACCACCUGAUGAGCUUCCUCAGUCUGCCCU  
CACGGCGUGGUGUUUCUGCACGUGACAUAACGUUCCCGCUCUAGAGAAGAAUUUACCA  
CCGCUCACAGCAUCUGCCACGACGGCAAAGCCACUUUCCUAGAGAAGGCGUGUUCGU  
GUCCAACGGCACCCAUUGGUUCGUGACACAGCGGAACUUCUACGAGCCCAGAUCAUCA  
CCACCGACAACACCUUCGUGUCUGGCAACUGCGACGUCGUGAUCGGCAUUGUGAACAA  
UACCGUGUACGACCCUCUGCAGCCCGAGCUGGACAGCUUCAAGAGGAACUGGACAAG  
UACUUUAAGAACCACACAAGCCCCGACGUGGACCUGGGCGAUUCAGCGGAAUCAAUUC  
CAGCGUCGUGAACAUCCAGAAAGAGAUCCGACCGGCUGAACGAGGUGGCCAAGAAUCUG  
AACGAGAGCCUGAUCGACCUGCAAGAACUGGGGAAGUACGAGCAGUACAUCAAGUGGC  
CCUGGUACAUCUGGCUGGGCUUUAUCGCCGGACUGAUUGCCAUCGUGAUGGUCACAAU  
CAUGCUGUGUUGCAUGACCAGCUGCUGUAGCUGCCUGAAGGGCUGUUGUAGCUGUGG  
CAGCUGCUGCAAGUUCGACGAGGACGAUUCUGAGCCCGUGCUGAAGGGCGUGAAACUG  
CACUACACAUGAGCGGCCGCGAAUUGGCAAGCUGCUUACAUAAGAACUCGCGGCGAUUG  
GCAUGCCGCCUAAAAUUUUUAUUUUUAUUUUUCUUUUUCUUUUCCGAAUCGGAUUUUGU  
UUUAAUAUUUCAAAAAAAAAAAAAAAAAAAAAAAAAAAAAAAAAAAAAA

**Supplementary Figure 6.** Sequence of saRNA encoding NSP1-4 of VEEV and the spike glycoprotein of SARS-CoV-2.

**Supplementary Table 1.** Primers used for sequencing of SARS-CoV-2 saRNA vector.

| <b>Sequencing Primer Name</b> | <b>Sequence</b>         |
|-------------------------------|-------------------------|
| nCoV FOR_1                    | AGAGCCTGCTGATCGTGAAC    |
| nCoV FOR_2                    | TACCTGACACCTGGCGATAG    |
| nCoV FOR_3                    | TGTCCCCTACCAAGCTGAAC    |
| nCoV FOR_4                    | GAAGTCTGTCATGCCCCCT     |
| nCoV FOR_5                    | CGCCCAAGTGAAGCAGAT      |
| nCoV FOR_6                    | CGAGAACCAGAAGCTGATCG    |
| nCoV FOR_7                    | ATGAGCTTCCCTCAGTCTGC    |
| nCoV FOR_8                    | AAGAGATCGACCGGCTGAA     |
| nCoV REV_1                    | GTGGTAGTAGACGCCCAGGA    |
| nCoV REV_2                    | TCAGCAGGAAGGTTCTAGGC    |
| nCoV REV_3                    | CAATCTGCCGCACTTCATCT    |
| nCoV REV_4                    | CAGGCCGTTGAAGTTGAAGT    |
| nCoV REV_5                    | GGCTGTTTGTCTGTGTCTGG    |
| nCoV REV_6                    | TGCTAGGATCGGGCAGAAT     |
| nCoV REV_7                    | GCGCTTGCTGTGCTGCTC      |
| nCoV REV_8                    | GCGGTGGTCAAATTCTTCTC    |
| nCoV REV_9                    | GGGCACTTGATGTACTGCT     |
| VEEV sgp FW                   | ATCATTCAGCTACCTGAGAGG   |
| VEEVrep-Not1-Rev              | CTATGTAAGCAGCTTGCCAATTC |
